# Supplementary material for: Association of FKBP5 polymorphisms with patient susceptibility to coronary artery disease comorbid with depression
Source: PeerJ. 2020 Jun 3;8:e9286. doi: 10.7717/peerj.9286 (PMC7275678; doi:10.7717/peerj.9286)
Supplement: Supplemental Information 2 [file peerj-08-9286-s002.xls]

## Sheet: raw data
					genetype
group					FKBP5	FKBP5	FKBP5	FKBP5	FKBP5	FKBP5	FKBP5
1=CAD+D 2=CAD-D 3=health	1=CAD 2=health	marital status	PHQ-9 score	gender	rs1360780	rs2817032	rs2817035	rs9296158	rs9470079	rs4713902	rs3800373
1	1	YES	9	female	CC	TT	GA	GG	GG	CC	CA
1	1	YES	18	female	TT	TC	GG	AA	GG	TT	CA
1	1	YES	6	female	CC	TC	GA	GG	GG	TC	CA
2	1	YES	2	female	CC	TT	GG	GG	GG	TC	CC
1	1	YES	9	male	TT	CC	AA	AA	GG	TT	AA
1	1	YES	7	female	CC	TT	GG	GG	GA	TC	CC
2	1	YES	3	male	CC	TT	GG	GG	AA	TT	CC
2	1	YES	1	male	CT	TC	GA	GA	GG	TC	CA
2	1	YES	4	female	CT	TC	GG	GA	GG	TC	CA
1	1	YES	17	male	CC	TT	GA	GA	GG	TT	CC
1	1	YES	8	female	CT	TC	GA	GA	GG	TC	CA
2	1	YES	0	male	CC	TT	GG	GG	GA	TC	CC
2	1	YES	1	female	CC	TT	GA	GA	GA	TC	CA
2	1	YES	3	male	CC	TT	GG	GA	GG	TC	CA
2	1	YES	0	female	CC	TT	GG	AA	GG	TT	CA
1	1	YES	8	female	CT	TT	GA	GG	GA	TT	CC
2	1	YES	2	female	CC	TT	GG	GA	GA	TT	CC
2	1	YES	2	male	TT	TC	GA	GA	GA	TT	CA
2	1	YES	0	male	CC	TT	GA	GG	AA	CC	CA
2	1	YES	2	female	CC	TT	GA	GG	GA	TC	CA
1	1	YES	7	male	CC	TT	GG	GG	AA	CC	CC
2	1	YES	2	male	CT	TC	GA	GA	GA	TT	CA
2	1	YES	0	female	TT	CC	GA	GA	GA	TT	CA
2	1	YES	4	female	CC	TT	GG	GG	GA	TC	CA
2	1	YES	2	female	TT	CC	AA	AA	GG	TT	AA
1	1	YES	7	male	CC	TT	GG	GG	GG	CC	CA
1	1	YES	7	female	TT	CC	AA	AA	GG	TT	AA
2	1	YES	0	male	CC	TT	GG	GG	GA	TC	CC
2	1	YES	0	female	CC	TT	GG	GG	AA	TT	CC
1	1	YES	9	female	CT	TC	GA	GA	GA	TT	CC
2	1	YES	1	male	CC	TT	GG	GG	AA	TT	CC
2	1	YES	2	female	CC	TC	GA	GG	AA	TT	CA
1	1	YES	9	female	CC	TT	GG	GG	GA	TC	CA
1	1	YES	9	female	CT	TC	GA	GA	GG	TC	CA
1	1	YES	7	male	CC	TC	GA	GG	GG	TT	CA
1	1	YES	5	female	CT	TC	GA	AA	GG	TT	CA
1	1	YES	5	male	CT	TT	GG	GA	GG	TT	CA
1	1	YES	9	female	CC	TT	GG	GG	GG	CC	CA
2	1	YES	3	female	CC	TT	GG	GG	GA	TC	CC
2	1	YES	3	male	CC	TT	GA	GG	GA	TC	CC
2	1	YES	2	male	CT	TC	GA	AA	GG	TT	CA
2	1	YES	1	female	CT	TC	GA	GA	GA	TT	CA
2	1	YES	2	male	CC	TT	GG	GG	GA	TC	CC
1	1	YES	6	male	CT	TC	GA	GA	GG	TC	CC
2	1	YES	0	female	CT	TT	GG	GA	GG	TC	CA
1	1	YES	12	female	CT	TC	GA	AA	GG	TT	CA
2	1	YES	0	female	CC	TT	GG	GA	GG	TC	CA
2	1	YES	4	male	CT	TC	GA	AA	GG	TT	CA
1	1	YES	9	female	CT	TC	GA	AA	GG	TT	CA
1	1	YES	11	female	CC	TT	GG	GG	AA	TT	CA
1	1	YES	8	female	CT	TC	GA	GA	GG	TT	CA
1	1	YES	9	male	CT	TC	GA	GA	GA	TT	CA
2	1	YES	1	male	CC	TC	GA	GG	GA	TC	CC
1	1	YES	8	female	CC	TT	GG	GA	GA	TT	CC
2	1	YES	4	male	CT	TC	GA	GA	GA	TT	CA
2	1	YES	0	male	CC	TT	GG	GG	GA	TC	CC
1	1	YES	6	male	TT	CC	GA	AA	GG	TT	AA
1	1	YES	5	male	CT	TT	GG	GA	GA	TT	CA
1	1	YES	11	female	CC	TT	GG	GG	GG	CC	CC
1	1	YES	5	male	CC	TT	GG	GG	GG	TC	CC
2	1	YES	4	male	CC	TT	GG	GG	GG	TC	CA
1	1	YES	10	female	CT	TC	GA	GA	GG	TC	CA
1	1	YES	11	female	CC	TT	GG	GA	GG	TC	CA
2	1	YES	0	male	CC	TT	GG	GG	GA	TT	CA
2	1	YES	3	female	TT	CC	GA	AA	GG	TT	AA
1	1	YES	7	female	CT	TT	GG	GA	GA	TT	CA
1	1	YES	12	female	CT	TC	GA	GA	GG	TT	CA
2	1	YES	1	male	CC	TC	GA	GG	GG	TC	CC
1	1	YES	5	male	CT	TC	GA	GA	GG	TT	CA
1	1	YES	7	male	CT	CC	GA	GA	GG	TT	CA
2	1	YES	0	female	CT	TC	GA	AA	GG	TT	CA
1	1	YES	6	female	CC	TC	GA	GA	GG	TC	CA
2	1	YES	2	female	CT	TC	GG	GA	GG	TC	AA
1	1	YES	15	female	CC	TT	GG	GG	GG	CC	CA
1	1	YES	10	male	CC	TT	GG	GG	GA	TC	CA
1	1	YES	9	female	CT	TC	GG	AA	GG	TT	CA
2	1	YES	1	male	CC	TC	GA	GA	GA	TT	CA
2	1	YES	0	male	CC	TT	GG	GG	GA	TC	CC
1	1	YES	6	female	CT	TC	GA	GA	GA	TT	CA
1	1	YES	6	male	CC	TT	GG	GG	GG	TC	CC
1	1	YES	5	female	CT	CC	AA	GA	GG	TC	CA
2	1	YES	2	female	CT	TC	GA	AA	GG	TT	CA
2	1	YES	3	female	CT	TC	GG	GA	GG	TC	CA
1	1	YES	6	male	CC	TC	GA	GG	GA	TT	CC
1	1	YES	8	female	CT	TT	GG	GA	GG	TC	CA
1	1	YES	8	male	CC	TC	GA	GG	GG	TT	CA
2	1	YES	0	male	CC	TT	GG	GG	GA	TC	CC
1	1	YES	10	female	CT	TC	GA	GA	GG	TC	CA
2	1	YES	2	female	CT	TC	GA	GA	GG	TT	CA
2	1	YES	4	female	CT	TC	GA	GA	GA	TT	CA
1	1	YES	5	male	CT	TC	GA	GA	GA	TT	CA
2	1	YES	2	male	CC	TT	GG	GG	AA	TT	CA
1	1	YES	6	female	CT	TC	GA	GA	GG	TC	CA
2	1	YES	0	male	CT	TT	GA	GG	AA	TT	CA
1	1	YES	5	male	CC	TC	GA	GA	GA	TT	CA
1	1	YES	8	female	CT	TT	GG	GA	GG	TT	CA
1	1	YES	13	female	CT	TC	GA	AA	GG	TT	CA
2	1	YES	0	female	CC	TT	GG	GA	GG	TC	CA
2	1	YES	1	male	CC	TT	GG	GG	GA	TC	CC
2	1	YES	1	female	CT	TC	GG	GA	GG	TC	CA
2	1	YES	4	male	CT	TT	GG	AA	GG	TT	CA
2	1	YES	2	female	CC	TC	GA	GG	GG	TC	CC
2	1	YES	1	male	CT	TT	GA	GA	GA	TT	CA
2	1	YES	0	male	CC	TT	GG	GG	GA	TC	CC
1	1	YES	5	female	CT	TC	GA	GA	GA	TT	CA
2	1	YES	1	female	CC	TC	GA	GG	GA	TT	CA
1	1	YES	19	female	CT	TT	GG	GA	GA	TT	CA
1	1	YES	9	male	CT	TC	GA	GA	GA	TT	CA
1	1	YES	19	female	CC	TT	GA	GA	GG	TC	CA
1	1	YES	14	female	CT	TC	GA	AA	GG	TT	CA
1	1	YES	17	female	CC	TT	GG	GG	GA	TC	CC
2	1	YES	4	male	CC	TC	GA	GA	GA	TT	CC
2	1	YES	0	male	CT	CC	GA	GA	GA	TT	CA
1	1	YES	6	male	CC	TT	GG	GG	AA	TT	CA
2	1	YES	0	male	CC	TT	GG	GG	GA	TC	CA
1	1	YES	8	female	CC	TT	GG	GG	AA	TT	CC
2	1	YES	3	female	CT	TC	GA	GA	GA	TT	CA
2	1	YES	1	female	CT	TT	GG	GA	GA	TT	CA
1	1	YES	8	female	CC	TT	GG	GG	GA	TT	CA
2	1	YES	0	female	CT	CC	GA	AA	GG	TT	CA
1	1	YES	5	male	CT	TC	GA	GA	GG	TC	CA
2	1	YES	2	male	CC	TT	GG	GG	GA	TC	CC
2	1	YES	0	male	CT	TC	GA	AA	GG	TT	CC
2	1	YES	1	female	CC	TT	GG	GG	GA	TC	CC
1	1	YES	7	female	CC	TT	GG	GG	GA	TC	CC
2	1	YES	3	male	CT	TT	GG	GA	GG	TT	CA
2	1	YES	2	male	TT	TC	GA	GA	GG	TT	CA
1	1	YES	5	female	CC	TT	GG	GG	GG	TC	CC
1	1	YES	9	male	CC	TT	GA	GG	GG	TC	CA
1	1	YES	8	female	CT	TC	GA	GA	GG	TT	CA
2	1	YES	3	male	CC	TT	GG	GG	AA	TT	CC
2	1	YES	4	male	CT	TC	GA	AA	GG	TT	CA
2	1	YES	2	male	CT	TT	GG	GA	GG	TC	CA
2	1	YES	0	female	CT	TC	GG	GA	GG	TT	CA
1	1	YES	6	female	CC	TT	GG	GG	GA	TC	CC
2	1	YES	0	male	TT	CC	AA	AA	GG	TT	AA
1	1	YES	7	male	CT	TC	GA	GA	GA	TT	CA
1	1	YES	6	female	CC	TT	GG	GG	GG	TC	CC
1	1	YES	8	female	CC	TT	GG	GG	AA	TT	CA
2	1	YES	1	male	CC	TT	GA	GA	GA	TT	CC
1	1	YES	7	female	CT	TC	GA	GA	GA	TT	CA
2	1	YES	2	female	CC	TT	GG	GG	GA	TC	CA
1	1	YES	16	female	CC	TT	GG	GG	GG	CC	CC
2	1	YES	3	female	CC	TT	GA	GG	GA	TC	CA
2	1	YES	4	female	CT	TT	GG	AA	GG	TT	AA
1	1	YES	5	female	CC	CC	GA	GG	AA	TT	CC
1	1	YES	5	female	CT	TT	GG	GA	GA	TT	CA
2	1	YES	3	female	CT	TT	GG	GA	GG	TC	CA
2	1	YES	2	female	CC	TC	GA	GG	GA	TT	CC
2	1	YES	0	female	CC	TC	GA	GG	GG	TT	CC
2	1	YES	0	male	CT	TT	GA	GA	GG	TT	CA
1	1	YES	6	female	CC	TT	GA	GG	GG	CC	CC
2	1	YES	3	female	CT	TC	GA	GA	GA	TT	CA
2	1	YES	4	female	CT	TT	GG	GA	GG	TC	CA
2	1	YES	2	male	CC	TT	GG	GG	GA	TT	CC
2	1	YES	2	female	CT	CC	AA	GA	GA	TT	CA
1	1	YES	7	male	CC	TT	GG	GG	GG	TC	CA
1	1	YES	5	male	TT	CC	AA	AA	GG	TT	AA
1	1	YES	5	female	TT	TC	GA	AA	GG	TT	AA
2	1	YES	3	female	CT	TC	GA	GA	GA	TT	CA
1	1	YES	9	female	CT	TC	GA	GA	GG	TC	CA
2	1	YES	1	male	TT	TT	GG	AA	GG	TT	AA
1	1	YES	10	male	CC	TT	GG	GG	GA	TT	CC
1	1	YES	5	female	CT	TC	GA	GA	GA	TT	CC
2	1	YES	0	female	CT	TC	GA	GG	GG	TC	CA
2	1	YES	1	female	CC	TT	GG	GG	GG	CC	CA
1	1	YES	9	female	CT	TC	GA	GA	GG	TC	CA
1	1	YES	9	female	CC	TT	GG	GG	AA	TT	CA
1	1	YES	7	male	CC	TT	GG	GG	GA	TC	CA
1	1	YES	5	female	CC	TT	GG	GA	GA	TT	CC
1	1	YES	6	male	CC	TT	GG	GG	AA	TT	CC
2	1	YES	1	male	CC	TT	GG	GG	GA	TC	CA
2	1	YES	2	female	TT	CC	AA	AA	GG	TT	AA
2	1	YES	1	female	CC	TC	GA	GA	GG	TC	CA
2	1	YES	3	female	CC	TT	GG	GG	GA	TT	CC
2	1	YES	3	female	CT	TC	GA	GA	GA	TT	CA
2	1	YES	1	male	CC	TT	GG	GG	AA	TT	CA
2	1	YES	1	female	CC	TT	GG	GG	AA	TT	CA
2	1	YES	2	female	CC	TT	GG	AA	GG	TT	CC
2	1	YES	1	female	CT	TT	GA	GA	GG	TC	CA
2	1	YES	3	male	CT	TC	GA	GA	GA	TT	CA
2	1	YES	1	female	CC	TT	GG	GG	GA	TC	CC
2	1	YES	2	male	CT	TC	GA	GA	GA	TT	CA
2	1	YES	0	male	CC	TT	GG	GA	GA	TT	CC
2	1	YES	0	male	CT	TC	GA	GA	GG	TC	CA
2	1	YES	1	male	CC	TT	GG	GG	GG	TC	CA
2	1	YES	2	female	CT	TT	GG	GA	GG	TC	CA
2	1	YES	0	female	CC	TT	GG	GG	GG	CC	CC
2	1	YES	0	male	CT	TC	GA	GA	GA	TT	CA
2	1	YES	2	male	CC	TC	GA	GA	GA	TT	CC
1	1	YES	5	female	CC	TT	GG	GG	GG	TC	CC
2	1	YES	3	female	CC	TC	GA	GA	GG	TC	CA
1	1	YES	8	male	CC	TT	GG	GG	GA	TC	CA
2	1	YES	2	male	CC	TT	GG	GG	AA	TT	CC
1	1	YES	9	male	CT	TC	GA	AA	GG	TT	CC
2	1	YES	0	male	CT	TC	GA	AA	GG	TT	CA
1	1	YES	7	male	CC	TT	GG	GG	GG	CC	CC
1	1	YES	5	male	CC	TT	GG	GA	GG	TT	CA
1	1	YES	9	male	TT	TT	GG	GA	GG	TT	CA
1	1	YES	5	female	CC	TT	GG	GG	GG	CC	CC
2	1	YES	4	female	CT	TC	GA	AA	GG	TT	CA
2	1	YES	1	male	CT	TT	GA	GG	GG	TC	CA
2	1	YES	0	male	CT	CC	GA	AA	GG	TT	AA
2	1	YES	0	male	CC	TT	GA	GA	GG	TC	CA
1	1	YES	9	male	CC	TT	GA	GG	GG	TC	CA
2	1	YES	0	male	CT	TC	GA	GA	GG	TC	CA
1	1	YES	5	female	CT	TC	GA	GA	GA	TT	CA
2	1	YES	1	male	CT	CC	GA	GA	GG	TT	CA
2	1	YES	2	female	CT	TC	GA	GA	GA	TT	CA
1	1	YES	6	male	CT	TC	GA	GA	GG	TC	CA
1	1	YES	6	male	CC	TT	GG	GG	GA	TC	CA
2	1	YES	1	male	CC	TT	GG	GG	AA	TT	CC
2	1	YES	3	male	CC	TT	GG	GG	GA	TT	CA
1	1	YES	7	male	CT	TC	GA	GA	GA	TT	CA
1	1	YES	11	male	CT	TC	GA	GA	GG	TC	CA
2	1	YES	2	female	CC	TT	GA	GA	GA	TT	CA
1	1	YES	12	female	CT	TT	GA	GA	GG	TC	CA
1	1	YES	9	female	CC	TT	GG	GG	GA	TC	CA
1	1	YES	9	female	CC	TT	GG	GG	GA	TC	CC
2	1	YES	0	male	CT	TC	GA	GA	GA	TT	CA
2	1	YES	0	female	CT	TC	GA	GA	GG	TC	CA
1	1	YES	6	male	CT	CC	AA	GA	GG	TT	CA
2	1	YES	4	female	CT	TC	GA	AA	GG	TT	AA
2	1	YES	3	female	CC	TT	GA	GG	GA	TC	CA
2	1	YES	0	female	CC	TT	GG	GG	GG	CC	CA
2	1	YES	1	female	CT	TC	GA	GA	GA	TT	CA
2	1	YES	4	female	CT	TC	GA	GA	GG	TC	CA
2	1	YES	0	female	CC	TT	GG	GG	GG	CC	CA
1	1	YES	6	male	CT	TT	GA	GG	GA	TC	CA
1	1	YES	6	female	CC	TT	GA	GG	GA	TC	CC
1	1	YES	5	male	CC	TT	GA	GG	GA	TC	CC
2	1	YES	2	female	CC	TT	GG	GG	AA	TT	CC
2	1	YES	4	male	CT	TC	GA	GA	GA	TT	CA
2	1	YES	2	male	CC	TT	GG	GA	GG	TC	CA
1	1	YES	5	male	CT	TT	GG	GA	GG	TC	CA
2	1	YES	2	female	CT	TT	GG	AA	GG	TT	CA
1	1	YES	7	male	CC	TT	GG	GG	GG	CC	CA
1	1	YES	7	female	CT	TC	GA	GA	GA	TT	CA
2	1	YES	1	female	CC	TT	GA	GG	GG	TC	CA
2	1	YES	0	male	CC	TT	GG	GG	GG	TC	CA
1	1	YES	8	male	CC	TT	GA	GG	GA	TC	CA
2	1	YES	2	male	CC	TT	GG	GG	GG	TC	CA
1	1	YES	13	male	CC	TT	GG	GG	GA	TC	CA
2	1	YES	4	male	CC	TT	GG	GG	GG	TC	CA
1	1	YES	7	male	CT	TC	GA	GA	GG	TC	CA
2	1	YES	1	female	CT	TT	GG	GA	GG	TC	CA
1	1	YES	7	male	CT	TC	GA	GA	GA	TT	CA
1	1	YES	8	male	CC	TT	GG	GA	GA	TT	CC
2	1	YES	1	male	CT	TT	GG	GA	GA	TT	CA
2	1	YES	3	male	CT	TC	GA	AA	GG	TT	CA
2	1	YES	4	male	CC	TT	GG	GA	GG	TC	CA
1	1	YES	8	male	CC	TC	GA	GG	GA	TT	CA
2	1	YES	0	female	CC	TT	GG	GG	GG	TC	CC
1	1	YES	7	male	CT	TC	GA	GA	GG	TC	CA
1	1	YES	8	female	CT	TC	GA	GA	GG	TC	CA
1	1	YES	8	male	CT	TC	AA	GA	GG	TC	CA
2	1	YES	3	female	CT	TC	GA	GA	GG	TT	CA
1	1	未婚	5	male	CT	TC	GA	GA	GA	TT	CA
2	1	YES	2	male	CT	TC	GA	AA	GG	TT	AA
1	1	YES	9	female	CT	TC	GA	AA	GG	TT	AA
2	1	YES	1	female	CT	TC	GA	GA	GG	TC	CA
2	1	YES	0	female	CC	TC	GA	GG	GG	TT	CA
1	1	YES	7	female	CC	TC	GA	GG	GG	TT	CC
1	1	YES	9	female	CC	TT	GA	GG	GG	TC	CA
2	1	YES	2	male	CC	CC	GA	GG	AA	TT	CA
1	1	YES	6	female	CT	TC	GA	GA	GG	TC	CC
2	1	YES	3	male	CT	CC	AA	GA	GG	TT	CA
1	1	YES	5	female	CC	TT	GG	GG	GA	TC	CC
2	1	YES	2	male	CT	TT	GG	GA	GA	TT	CA
2	1	YES	0	male	CT	TC	GA	GA	GG	TT	CA
3	2			male	CC	TT	GG	GG	GA	TC	CC
3	2			male	CC	TT	GA	GA	GA	TT	CA
3	2			male	CC	TT	GG	GG	GA	TT	CC
3	2			female	CT	TT	GA	GA	GG	TC	CA
3	2			male	CT	TC	GA	GA	GA	TT	CA
3	2			male	CT	TC	GA	GA	GG	TC	CA
3	2			male	CC	TC	GA	GG	GG	CC	CC
3	2			female	CT	TC	GA	GA	GA	TT	CA
3	2			female	TT	TC	GA	AA	GG	TT	AA
3	2			female	CC	TT	GA	GG	GA	TC	CA
3	2			male	CC	TT	GG	GG	GA	TT	CC
3	2			female	CT	TC	GA	GA	GA	TT	CA
3	2			female	CC	TT	GA	GA	GG	TC	CA
3	2			female	CT	TC	GA	GA	GG	TC	CA
3	2			male	CT	CC	GA	AA	GG	TT	CA
3	2			male	CC	TC	GG	GG	GA	TT	CC
3	2			male	CT	TC	GA	AA	GG	TT	AA
3	2			male	CC	TT	GG	GG	AA	TT	CC
3	2			female	CT	TC	GA	GA	GA	TT	CA
3	2			male	CT	TT	GG	GA	GG	TC	CA
3	2			male	CT	TC	GA	GA	GG	TT	CA
3	2			male	CC	TT	GG	GG	GA	TC	CA
3	2			female	CT	TC	GA	GA	GA	TT	CA
3	2			male	CT	TT	GA	AA	GG	TC	CA
3	2			female	CC	TT	GA	GA	GA	TT	CA
3	2			male	CT	TT	GA	GG	AA	TT	CA
3	2			male	CC	TT	GG	GG	GA	TT	CA
3	2			female	CT	TC	GA	AA	GG	TT	AA
3	2			female	CT	TC	GA	AA	GG	TT	CA
3	2			female	CT	TC	GA	GA	GG	TC	CA
3	2			male	CT	TC	GA	GA	GA	TT	CA
3	2			female	CT	TC	GA	GA	GG	TC	CA
3	2			female	CC	TT	GG	GG	GA	TC	CC
3	2			male	CT	TC	GA	GA	GG	TC	CA
3	2			female	CC	TT	GG	GA	GA	TT	CC
3	2			male	CT	CC	GA	GA	GA	TT	CA
3	2			male	CT	TC	GG	GA	GA	TT	CA
3	2			male	CT	CC	GA	AA	GG	TT	CA
3	2			male	CC	TT	GA	GG	GA	TC	CA
3	2			male	CC	TT	GG	GA	GA	TT	CA
3	2			female	CC	TT	GG	GG	AA	TT	CC
3	2			female	CT	TC	GA	GA	GG	TT	CA
3	2			female	TT	TC	GA	AA	GG	TT	CA
3	2			male	CT	TT	GG	GA	GA	TT	CA
3	2			female	CT	TC	GA	AA	GG	TT	CA
3	2			male	CC	TT	GG	GG	AA	TT	CC
3	2			female	CC	TT	GG	GG	GA	TC	CC
3	2			female	CC	TT	GG	GG	GG	CC	CC
3	2			female	CT	TT	GG	GA	GA	TT	CA
3	2			female	CC	TT	GG	GG	GG	CC	CA
3	2			female	CT	TT	GG	GA	GA	TT	CA
3	2			male	CT	TC	GA	GA	GA	TT	CA
3	2			male	CC	TT	GG	GG	AA	TT	CC
3	2			female	CT	TT	GG	GA	GA	TT	CA
3	2			male	CT	TT	GA	GG	GG	TC	CA
3	2			female	CC	TT	GG	GG	GA	TC	CC
3	2			female	CT	TT	GG	GA	GA	TT	CA
3	2			female	CC	TT	GG	GG	GA	TT	CC
3	2			male	CC	TT	GG	GG	GG	CC	CA
3	2			female	CC	TT	GG	GG	GA	TT	CC
3	2			male	CC	TC	GA	GA	GA	TT	CA
3	2			male	CT	TC	GA	GA	GA	TT	CA
3	2			female	CC	TT	GG	GA	GG	TC	CA
3	2			male	CC	TT	GG	GG	GA	TT	CC
3	2			male	TT	TC	GA	AA	GG	TT	AA
3	2			male	CT	TT	GG	AA	GG	TT	CA
3	2			male	CT	TC	GA	GA	GA	TT	CA
3	2			female	CT	TT	GG	GA	GA	TT	CA
3	2			female	CC	TT	GG	GG	AA	TT	CC
3	2			female	CT	CC	GA	AA	GG	TT	CA
3	2			female	CT	TT	GG	GA	GG	TC	CA
3	2			female	CC	TT	GG	GG	AA	TT	CC
3	2			female	CT	TC	GA	GA	GG	TT	CA
3	2			male	CC	TT	GG	GG	GA	TT	CC
3	2			male	CC	TT	GG	GG	AA	TT	CC
3	2			female	CC	TT	GG	GG	AA	TT	CC
3	2			female	CC	TC	GA	GG	GA	TC	CC
3	2			female	CC	TC	GA	GA	GG	TT	CA
3	2			female	CC	TT	GG	GG	GA	TC	CA
3	2			female	CC	TT	GG	GG	GA	TC	CA
3	2			male	CC	TT	GG	GG	AA	TT	CC
3	2			male	CT	TC	GA	GA	GA	TT	CA
3	2			female	CC	TT	GG	GG	GA	TC	CC
3	2			female	CC	TT	GG	GG	GG	CC	CC
3	2			male	CC	TT	GG	GG	GG	CC	CA
3	2			female	CC	TT	GG	GG	GA	TC	CA
3	2			male	CC	TT	GG	GG	GA	TC	CC
3	2			male	CC	TT	GG	GA	GG	TC	CC
3	2			female	CC	TT	GG	GG	GA	TC	CC
3	2			male	CC	TT	GG	GG	GA	TC	CA
3	2			female	CT	TT	GG	GA	GA	TT	CA
3	2			male	CT	TC	GA	AA	GG	TT	CA
3	2			female	CC	TT	GG	GG	GA	TC	CC
3	2			female	CC	TT	GG	GG	GA	TT	CC
3	2			female	CT	TT	GG	GA	GG	TC	CA
3	2			male	CC	TT	GG	GG	GA	TC	CA
3	2			female	CT	TC	GA	GA	GA	TT	CA
3	2			male	CT	TC	GG	AA	GG	TT	CA
3	2			male	CC	TT	GG	GA	GG	TC	CC
3	2			female	TT	CC	GA	AA	GG	TT	CA
3	2			female	CT	TC	GA	GA	GA	TT	CA
3	2			female	CC	TT	GG	GG	GG	CC	CC
3	2			male	CC	TC	GA	GA	GG	TT	CC
3	2			female	CC	TT	GG	GG	GA	TT	CA
3	2			female	CT	TT	GG	GA	GG	TT	CA
3	2			male	CC	TT	GG	GA	GA	TT	CC
3	2			female	CC	TT	GG	GG	AA	TT	CC
3	2			female	CT	TC	GA	GA	AA	TT	CA
3	2			female	CC	TT	GG	GA	GA	TC	CA
3	2			male	CT	TC	GA	GA	GA	TT	CA
3	2			female	CC	TC	GA	GA	GA	TT	CA
3	2			female	CC	TT	GA	GG	AA	TT	CA
3	2			male	CC	TT	GA	GA	GA	TT	CA
